# Supplementary material
Source: PubMed Central journal article supplement (PMC9231818)

**A)**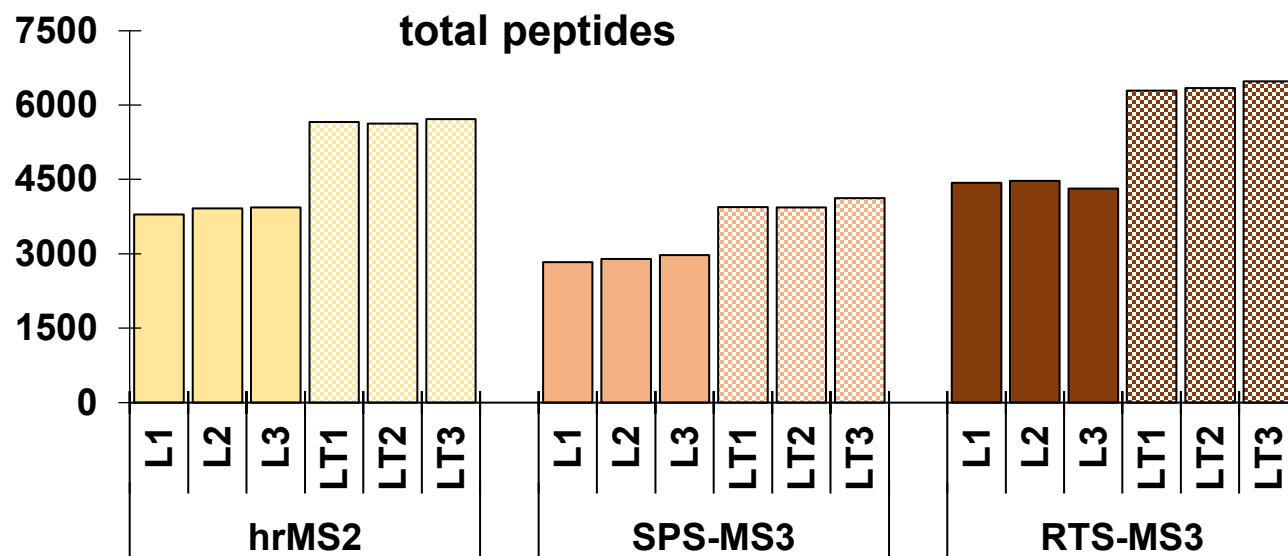**B)**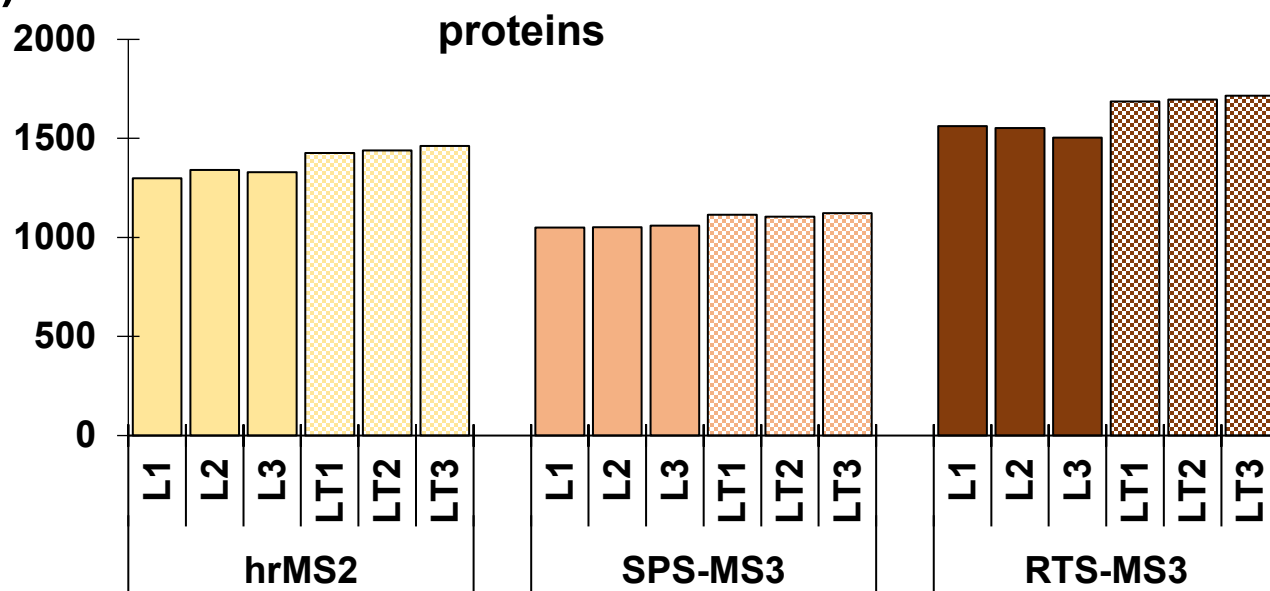**C)**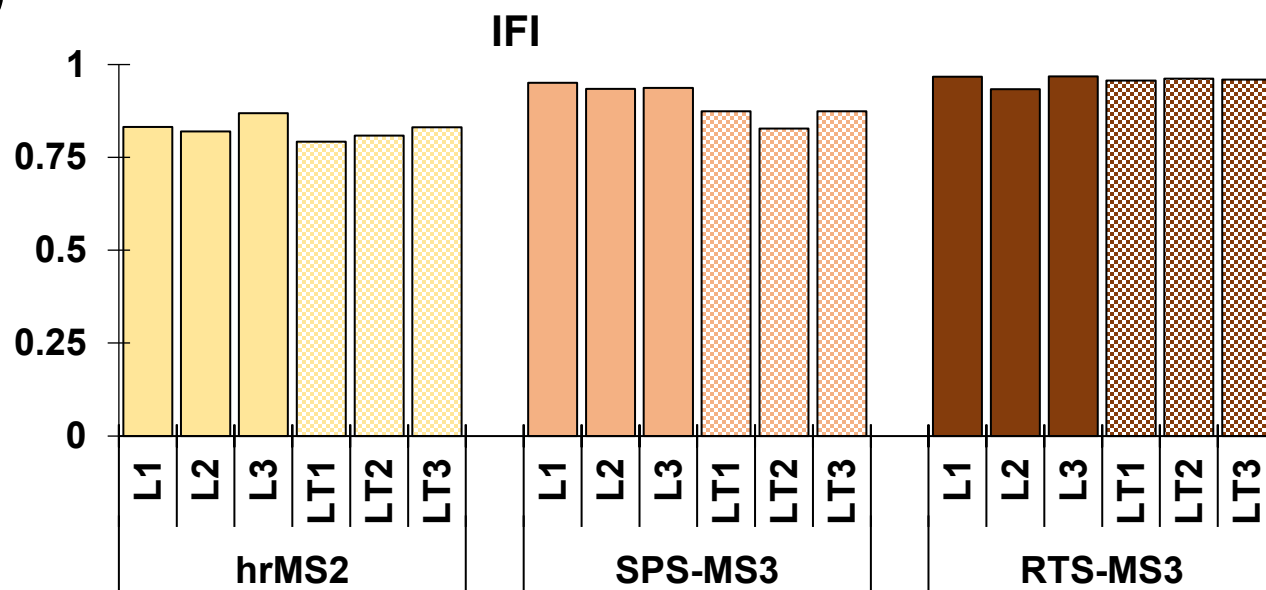

Supplement: NIHMS1817599-supplement-Figure_S1.pdf [file NIHMS1817599-supplement-Figure_S1.pdf]

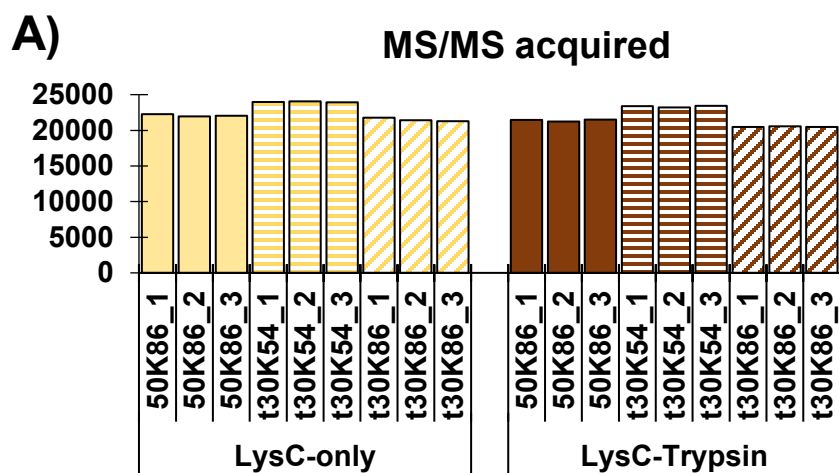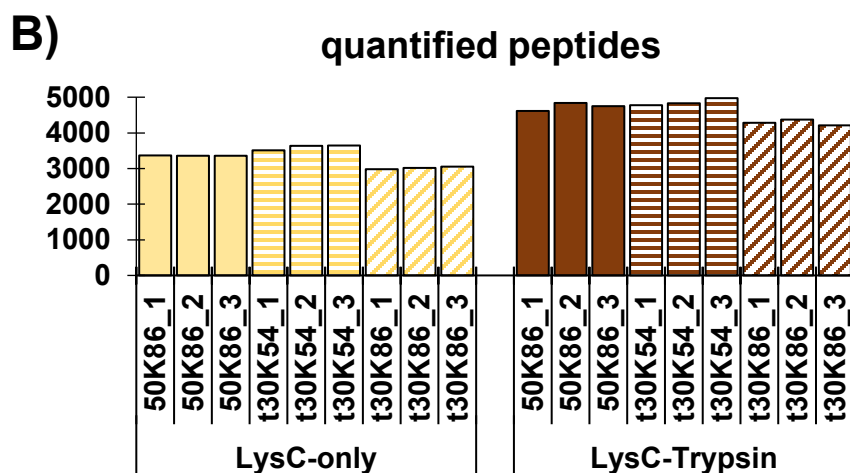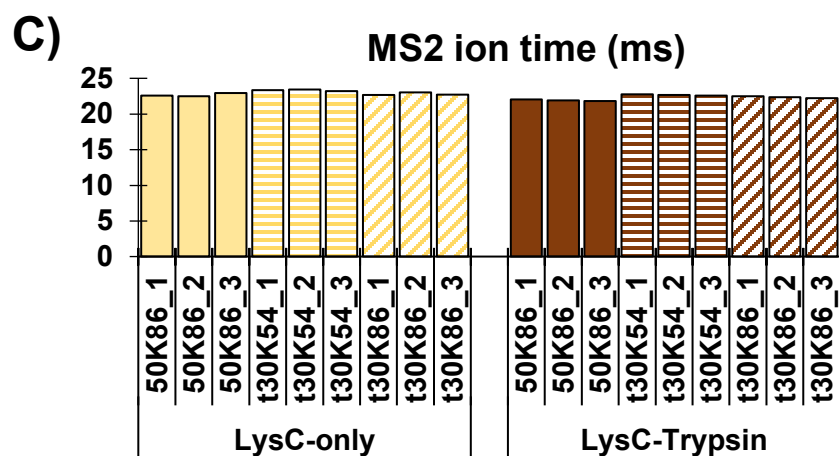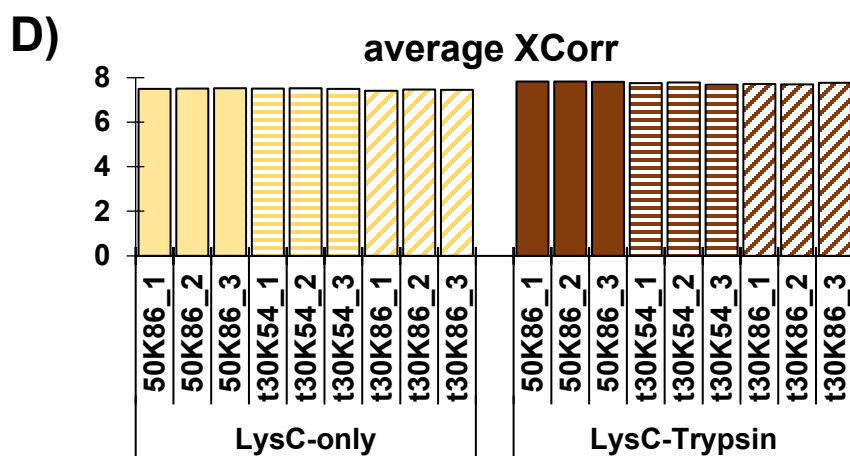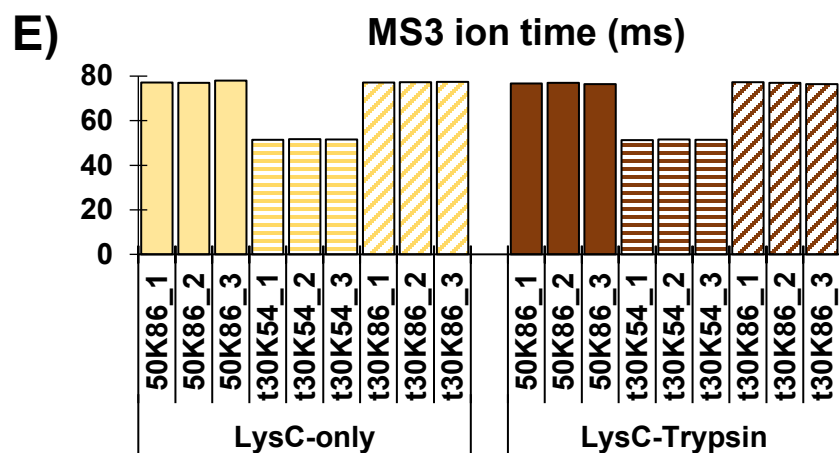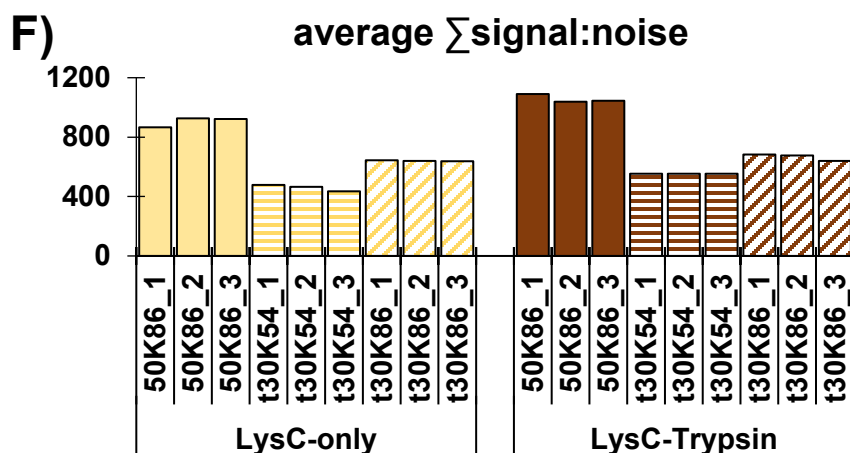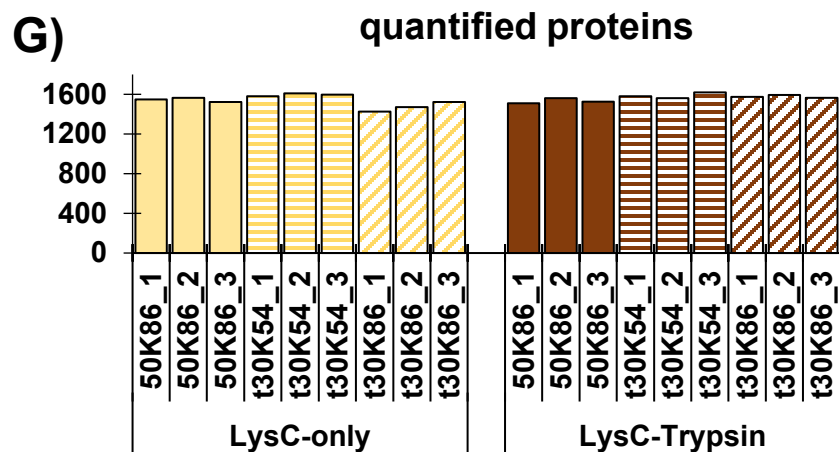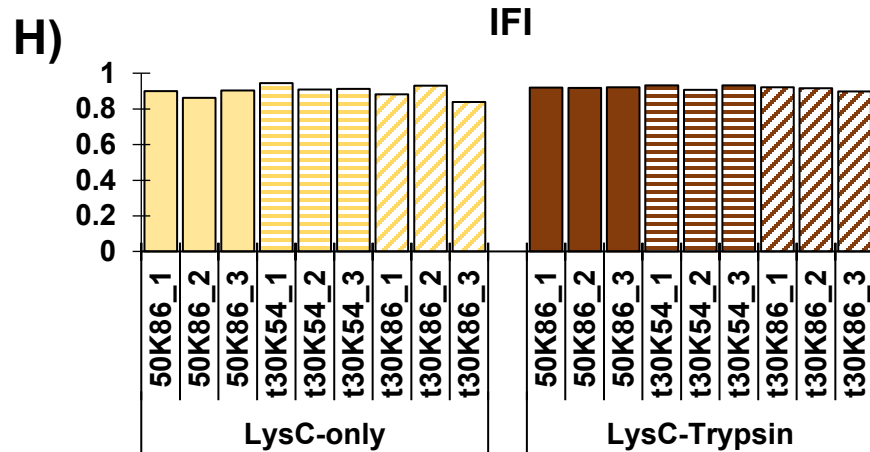

Supplement: NIHMS1817599-supplement-Figure_S3.pdf [file NIHMS1817599-supplement-Figure_S3.pdf]
